# Supplementary material for: How did the COVID-19 pandemic affect inpatient care for children in Germany? An exploratory analysis based on national hospital discharge data
Source: Springer Nature journal article supplement (doi:10.1186/s12913-023-09929-z), 2023-08-31

## ONLINE APPENDIX

### Contents

|                                                                    |           |
|--------------------------------------------------------------------|-----------|
| <b>Section 1: Data characteristics</b> .....                       | <b>2</b>  |
| <b>Section 2: Characteristics of total annual admissions</b> ..... | <b>3</b>  |
| <b>Section 3: Acute lymphoblastic leukaemia</b> .....              | <b>4</b>  |
| <b>Section 4: Appendicitis/Appendectomy</b> .....                  | <b>10</b> |
| <b>Section 5: Tonsillectomy/Adenoidectomy</b> .....                | <b>13</b> |

## Section 1: Data characteristics

**Table S1:** Data characteristics for years 2019, 2020, 2021 and 2022 according to the manual of the InEK data browser (version 28.03.2023)<sup>1</sup>

| Data for 2019 from “Data delivery DRG 2019 grouped by 2020 guidelines”                                                                                                                                                                                                                                                                                                                                                                                                                                                                                                                                                                                                                                                                                                                                                                                                                                                                                                                                                                    | Data for 2020 from “Data delivery DRG 2020 grouped by 2021 guidelines”                                                                                                                                                                                                                                                                                                                                                                                                                                                                                                                                                                                                                                                                                                                                                                                                                                                                                                                                                                          | Data for 2021 from “Data delivery DRG 2021 grouped by 2022 guidelines”                                                                                                                                                                                                                                                                                                                                                                                                                                                                                                                                                                                                                                                                                                                                                        | Data for 2022 from “Intra-year data delivery DRG January to December 2021”                                                                                                                                                                                                                                                                                                                                                                                                                                                                                                                                                                                                                                                                                                                                                       |
|-------------------------------------------------------------------------------------------------------------------------------------------------------------------------------------------------------------------------------------------------------------------------------------------------------------------------------------------------------------------------------------------------------------------------------------------------------------------------------------------------------------------------------------------------------------------------------------------------------------------------------------------------------------------------------------------------------------------------------------------------------------------------------------------------------------------------------------------------------------------------------------------------------------------------------------------------------------------------------------------------------------------------------------------|-------------------------------------------------------------------------------------------------------------------------------------------------------------------------------------------------------------------------------------------------------------------------------------------------------------------------------------------------------------------------------------------------------------------------------------------------------------------------------------------------------------------------------------------------------------------------------------------------------------------------------------------------------------------------------------------------------------------------------------------------------------------------------------------------------------------------------------------------------------------------------------------------------------------------------------------------------------------------------------------------------------------------------------------------|-------------------------------------------------------------------------------------------------------------------------------------------------------------------------------------------------------------------------------------------------------------------------------------------------------------------------------------------------------------------------------------------------------------------------------------------------------------------------------------------------------------------------------------------------------------------------------------------------------------------------------------------------------------------------------------------------------------------------------------------------------------------------------------------------------------------------------|----------------------------------------------------------------------------------------------------------------------------------------------------------------------------------------------------------------------------------------------------------------------------------------------------------------------------------------------------------------------------------------------------------------------------------------------------------------------------------------------------------------------------------------------------------------------------------------------------------------------------------------------------------------------------------------------------------------------------------------------------------------------------------------------------------------------------------|
| <ul style="list-style-type: none"> <li>• Data for the billing area "DRG" from the data delivery according to § 21 KHEntgG as of 31.03.2020 for the data year 2019</li> <li>• Data grouped according to aG-DRG version 2019_2020. The grouping according to aG-DRG version 2019_2020 uses the same DRGs as interim data deliveries during the year in accordance with § 24 Para. 2 KHG for 2020 and thus enables a direct comparison.</li> <li>• Principal and secondary diagnoses according to ICD-10-GM Version 2019, procedures according to OPS Version 2019.</li> <li>• All data deliveries of hospitals with at least one treatment case in the billing area "DRG" submitted to the data centre by 31.05.2020 are included in the database.</li> <li>• Data supplied by hospitals; contain service data on all full and partial inpatient treatment cases discharged in the calendar year 2019 with care in main or inpatient departments.</li> <li>• Data has successfully passed the quality check (“error procedure”).</li> </ul> | <ul style="list-style-type: none"> <li>• Data for the billing area "DRG" from the data delivery according to § 21 KHEntgG as of 31.03.2021 for the data year 2020</li> <li>• Data grouped according to aG-DRG version 2020_2021. The grouping according to aG-DRG Version 2020_2021 uses the same DRGs as interim data deliveries during the year in accordance with Section 24 (2) KHG for 2021 and thus enables a direct comparison.</li> <li>• Principal and secondary diagnoses according to ICD-10-GM Version 2020, procedures according to OPS Version 2020.</li> <li>• All data deliveries of hospitals with at least one treatment case in the billing area "DRG" submitted to the data centre by 31.05.2021 are included in the database.</li> <li>• Data supplied by the hospitals; contain service data on all full and partial inpatient treatment cases discharged in the calendar year 2020 with care in main or inpatient departments.</li> <li>• Data has successfully passed the quality check (“error procedure”).</li> </ul> | <ul style="list-style-type: none"> <li>• Data for the billing area "DRG" from the data delivery according to § 21 Para. 3b KHEntgG as of 31.03.2022 for the data year 2021.</li> <li>• Data grouped according to aG-DRG Version 2021_2022</li> <li>• Principal and secondary diagnoses according to ICD-10-GM version 2021, procedures according to OPS version 2021.</li> <li>• All data deliveries of hospitals with at least one treatment case in the "DRG" billing area submitted to the data centre by 31 May 2022.</li> <li>• Data supplied by hospitals; contain service data on all services provided in the calendar year 2021 for full and partial inpatient treatment cases with care in main or inpatient departments.</li> <li>• Data has successfully passed the quality check (“error procedure”).</li> </ul> | <ul style="list-style-type: none"> <li>• Data for the billing area "DRG" from the data delivery according to § 21 Para. 3b KHEntgG as of 16.01.2023 for the data year 2021.</li> <li>• Data grouped according to aG-DRG Version 2022</li> <li>• Principal and secondary diagnoses according to ICD-10-GM version 2022, procedures according to OPS version 2022.</li> <li>• All data deliveries of hospitals with at least one treatment case in the "DRG" billing area submitted to the data centre by 16 January 2023.</li> <li>• Data supplied by hospitals; contain service data on all services provided between 01.01.2022-31.12.2022 for full and partial inpatient treatment cases with care in main or inpatient departments.</li> <li>• Data has successfully passed the quality check (“error procedure”).</li> </ul> |

Notes: DRG Diagnosis Related Groups; KHEntgG Krankenhausentgeltgesetz (Hospital Remuneration Act); KHG: Krankenhausfinanzierungsgesetz (Hospital Funding Act)

<sup>1</sup> <https://datenbrowser.inek.org/>

## Section 2: Characteristics of total annual admissions

**Table S2:** Characteristics of total annual admissions in German hospitals (children until the age of 18, newborns excluded)

| 2019         |           |                         |        |      |        |                  |        |
|--------------|-----------|-------------------------|--------|------|--------|------------------|--------|
| Cases        |           | Length of Stay          |        | PCCL |        | Age group        |        |
| Nr. Of cases | 1,278,814 | Short stays             | 29.37% | 0    | 83.85% |                  |        |
|              |           | Normal stays            | 68.51% | 1    | 7.18%  | 28 days - 1 year | 13.94% |
|              |           | Long stays              | 2.12%  | 2    | 4.19%  | 1-2 years        | 16.90% |
| <b>Sex</b>   |           |                         |        |      |        |                  |        |
| males        | 53.29%    |                         |        | 3    | 3.47%  | 3-5 years        | 15.61% |
| females      | 46.71%    | ALOS                    | 3.2    | 4    | 1.09%  | 6-9 years        | 14.27% |
| other        | 0.00%     | Standard deviation ALOS | 5.6    | 5    | 0.20%  | 10-15 years      | 26.41% |
| unknown      | 0.00%     |                         |        | 6    | 0.03%  | 16-17 years      | 12.86% |
| 2020         |           |                         |        |      |        |                  |        |
| Cases        |           | Length of Stay          |        | PCCL |        | Age group        |        |
| Nr. Of cases | 1,003,312 | Short stays             | 29.32% | 0    | 84.38% |                  |        |
|              |           | Normal stays            | 68.38% | 1    | 6.42%  | 28 days - 1 year | 14.29% |
|              |           | Long stays              | 2.29%  | 2    | 4.45%  | 1-2 years        | 15.85% |
| <b>Sex</b>   |           |                         |        |      |        |                  |        |
| males        | 53.38%    |                         |        | 3    | 3.43%  | 3-5 years        | 15.35% |
| females      | 46.62%    | ALOS                    | 3.3    | 4    | 1.07%  | 6-9 years        | 14.59% |
| other        | 0.00%     | Standard deviation ALOS | 5.9    | 5    | 0.21%  | 10-15 years      | 26.85% |
| unknown      | 0.00%     |                         |        | 6    | 0.03%  | 16-17 years      | 13.08% |
| 2021         |           |                         |        |      |        |                  |        |
| Cases        |           | Length of Stay          |        | PCCL |        | Age group        |        |
| Nr. Of cases | 1,026,341 | Short stays             | 30.00% | 0    | 83.93% |                  |        |
|              |           | Normal stays            | 67.81% | 1    | 6.75%  | 28 days - 1 year | 15.08% |
|              |           | Long stays              | 2.19%  | 2    | 4.43%  | 4.52%            | 17.13% |
| <b>Sex</b>   |           |                         |        |      |        |                  |        |
| males        | 53.43%    |                         |        | 3    | 3.45%  | 3-5 years        | 15.53% |
| females      | 46.56%    | ALOS                    | 3.3    | 4    | 1.11%  | 6-9 years        | 13.65% |
| other        | 0.00%     | Standard deviation ALOS | 6.0    | 5    | 0.20%  | 10-15 years      | 25.79% |
| unknown      | 0.01%     |                         |        | 6    | 0.03%  | 16-17 years      | 12.82% |
| 2022         |           |                         |        |      |        |                  |        |
| Cases        |           | Length of Stay          |        | PCCL |        | Age group        |        |
| Nr. Of cases | 1,116,826 | Short stays             | 30.61% | 0    | 81.42% |                  |        |
|              |           | Normal stays            | 67.34% | 1    | 9.01%  | 28 days - 1 year | 14.52% |
|              |           | Long stays              | 2.05%  | 2    | 5.00%  | 1-2 years        | 16.97% |
| <b>Sex</b>   |           |                         |        |      |        |                  |        |
| males        | 54.13%    |                         |        | 3    | 3.36%  | 3-5 years        | 17.29% |
| females      | 45.86%    | ALOS                    | 3.2    | 4    | 1.01%  | 6-9 years        | 14.68% |
| other        | 0.00%     | Standard deviation ALOS | 5.7    | 5    | 0.18%  | 10-15 years      | 24.77% |
| unknown      | 0.01%     |                         |        | 6    | 0.02%  | 16-17 years      | 11.76% |

Patient Clinical Complexity Level (PCCL) – A quantitative measure of the cumulative effects of patient complications/comorbidities per clinical episode

0 – No complication or comorbidity (CC) effect; 1 – Minor CC effect; 2 – Moderate CC effect; 3 – Severe CC effect; 4 – Extremely severe CC effect; 5/6 – Catastrophic CC effect

### Section 3: Acute lymphoblastic leukaemia

**Figure S1:** % change in monthly hospital admissions and ALOS for ALL in 2020, 2021 and 2022 compared to baseline year 2019

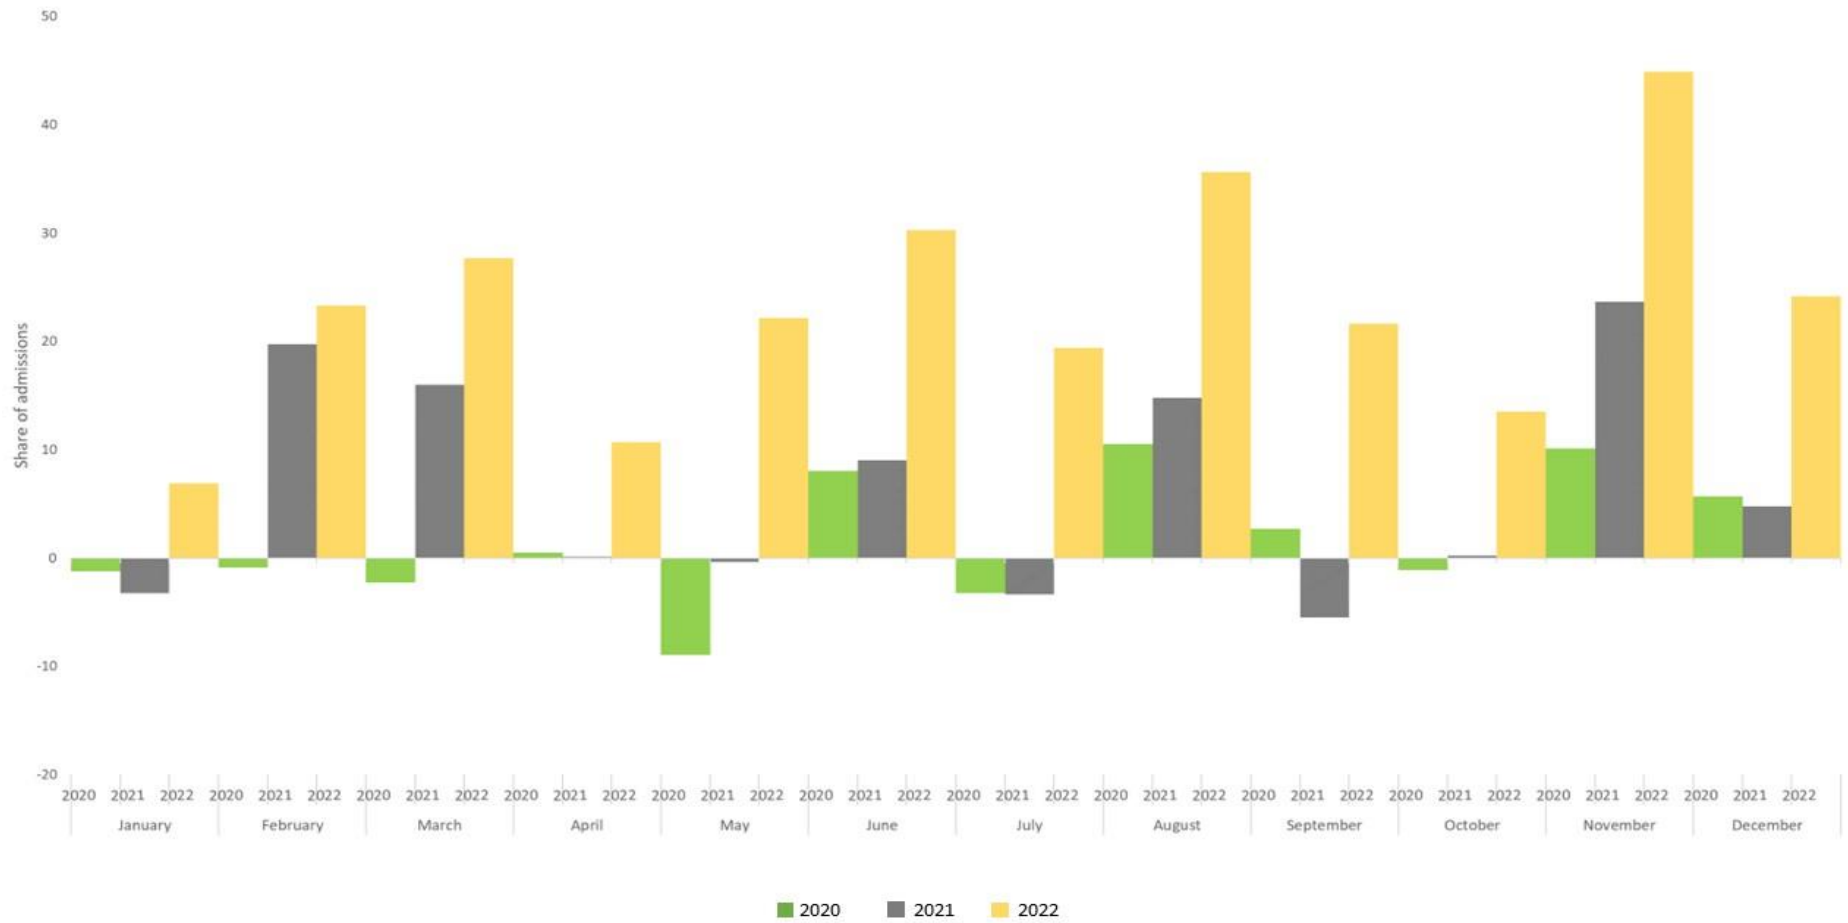

**Table S3:** Sex and age distribution of admitted ALL patients

|             |        | Gender |        | Age group  |        |        |        |         |         |
|-------------|--------|--------|--------|------------|--------|--------|--------|---------|---------|
|             |        | male   | female | 28 d - 1 y | 1-2 y  | 3-5 y  | 6-9 y  | 10-15 y | 16-17 y |
| <b>2019</b> |        |        |        |            |        |        |        |         |         |
| Total       | 10,119 | 56.61% | 43.39% | 1.62%      | 14.58% | 33.14% | 20.87% | 24.88%  | 4.91%   |
| January     | 1,059  | 54.20% | 45.80% | 1.42%      | 13.69% | 31.82% | 20.11% | 27.20%  | 5.76%   |
| February    | 703    | 54.91% | 45.09% | 0.85%      | 14.94% | 34.85% | 20.63% | 22.90%  | 5.83%   |
| March       | 794    | 54.03% | 45.97% | 1.26%      | 15.24% | 33.38% | 19.40% | 25.69%  | 5.04%   |
| April       | 971    | 53.66% | 46.34% | 1.34%      | 14.32% | 29.87% | 22.86% | 27.29%  | 4.33%   |
| May         | 840    | 51.67% | 48.33% | 2.14%      | 15.36% | 35.36% | 19.17% | 24.05%  | 3.93%   |
| June        | 743    | 56.93% | 43.07% | 2.02%      | 15.88% | 30.69% | 21.94% | 24.50%  | 4.98%   |
| July        | 1,015  | 57.44% | 42.56% | 1.58%      | 15.96% | 29.16% | 20.99% | 27.49%  | 4.83%   |
| August      | 797    | 60.10% | 39.90% | 1.00%      | 15.68% | 31.24% | 20.95% | 26.73%  | 4.39%   |
| September   | 808    | 58.04% | 41.96% | 2.10%      | 14.48% | 35.77% | 20.67% | 23.64%  | 3.34%   |
| October     | 983    | 60.83% | 39.17% | 2.03%      | 15.06% | 34.28% | 20.96% | 23.09%  | 4.58%   |
| November    | 719    | 57.86% | 42.14% | 1.81%      | 12.93% | 36.72% | 22.11% | 19.33%  | 7.09%   |
| December    | 687    | 60.55% | 39.45% | 1.89%      | 10.63% | 37.26% | 20.67% | 24.31%  | 5.24%   |
| <b>2020</b> |        |        |        |            |        |        |        |         |         |
| Total       | 10,246 | 58.65% | 41.35% | 0.61%      | 16.28% | 35.83% | 20.05% | 21.16%  | 6.07%   |
| January     | 1,046  | 59.18% | 40.82% | 0.67%      | 13.48% | 35.18% | 21.89% | 23.14%  | 5.64%   |
| February    | 697    | 57.53% | 42.47% | 1.15%      | 14.63% | 34.43% | 21.23% | 22.38%  | 6.17%   |
| March       | 776    | 56.44% | 43.56% | 0.39%      | 17.01% | 37.63% | 19.85% | 18.04%  | 7.09%   |
| April       | 976    | 57.79% | 42.21% | 1.02%      | 16.29% | 34.53% | 20.80% | 21.52%  | 5.84%   |
| May         | 765    | 58.56% | 41.44% | 1.05%      | 17.12% | 36.73% | 18.56% | 21.18%  | 5.36%   |
| June        | 803    | 55.92% | 44.08% | 0.37%      | 18.56% | 35.12% | 20.17% | 20.30%  | 5.48%   |
| July        | 982    | 57.33% | 42.67% | 0.51%      | 17.11% | 35.95% | 17.62% | 21.69%  | 7.13%   |
| August      | 881    | 61.98% | 38.02% | 0.23%      | 18.73% | 35.75% | 19.52% | 20.09%  | 5.68%   |
| September   | 830    | 61.69% | 38.31% | 0.36%      | 16.27% | 36.14% | 19.28% | 20.12%  | 7.83%   |
| October     | 972    | 57.20% | 42.80% | 0.51%      | 13.89% | 35.39% | 22.02% | 22.94%  | 5.25%   |
| November    | 792    | 58.84% | 41.16% | 0.51%      | 16.67% | 34.72% | 20.83% | 21.72%  | 5.56%   |
| December    | 726    | 61.57% | 38.43% | 0.69%      | 16.39% | 39.12% | 18.18% | 19.70%  | 5.92%   |
| <b>2021</b> |        |        |        |            |        |        |        |         |         |
| Total       | 10,661 | 57.59% | 42.41% | 1.81%      | 17.91% | 32.49% | 20.34% | 21.53%  | 5.93%   |
| January     | 1,025  | 60.20% | 39.80% | 1.27%      | 14.34% | 34.24% | 21.66% | 22.54%  | 5.95%   |
| February    | 842    | 59.38% | 40.62% | 2.38%      | 13.42% | 33.97% | 21.26% | 22.45%  | 6.53%   |
| March       | 921    | 57.55% | 42.45% | 1.52%      | 15.96% | 34.64% | 21.06% | 22.48%  | 4.34%   |
| April       | 972    | 55.14% | 44.86% | 1.13%      | 14.71% | 33.74% | 19.44% | 24.07%  | 6.89%   |
| May         | 837    | 56.75% | 43.25% | 1.55%      | 15.89% | 32.86% | 21.15% | 22.94%  | 5.62%   |
| June        | 810    | 60.12% | 39.88% | 2.22%      | 19.51% | 32.35% | 20.12% | 19.88%  | 5.93%   |

|             |        | Gender |        | Age group  |        |        |        |         |         |
|-------------|--------|--------|--------|------------|--------|--------|--------|---------|---------|
|             |        | male   | female | 28 d - 1 y | 1-2 y  | 3-5 y  | 6-9 y  | 10-15 y | 16-17 y |
| July        | 981    | 59.02% | 40.98% | 1.94%      | 19.78% | 31.60% | 21.00% | 21.00%  | 4.69%   |
| August      | 915    | 58.25% | 41.75% | 1.20%      | 18.14% | 34.54% | 20.33% | 21.09%  | 4.70%   |
| September   | 764    | 57.72% | 42.28% | 1.96%      | 21.73% | 30.37% | 19.50% | 21.86%  | 4.58%   |
| October     | 985    | 57.06% | 42.94% | 2.34%      | 21.12% | 29.54% | 19.90% | 19.29%  | 7.82%   |
| November    | 889    | 55.34% | 44.66% | 2.59%      | 20.25% | 31.38% | 18.34% | 20.02%  | 7.42%   |
| December    | 720    | 53.89% | 46.11% | 1.81%      | 21.39% | 29.86% | 20.00% | 20.42%  | 6.53%   |
| <b>2022</b> |        |        |        |            |        |        |        |         |         |
| Total       | 12,369 | 57.26% | 42.74% | 0.70%      | 19.44% | 32.25% | 20.62% | 21.76%  | 5.24%   |
| January     | 1,132  | 57.24% | 42.76% | 1.50%      | 26.50% | 26.86% | 21.02% | 18.46%  | 5.65%   |
| February    | 867    | 52.71% | 47.29% | 1.27%      | 27.34% | 25.49% | 23.99% | 17.88%  | 4.04%   |
| March       | 1,014  | 53.55% | 46.45% | 0.89%      | 23.57% | 29.29% | 24.56% | 16.77%  | 4.93%   |
| April       | 1,075  | 57.86% | 42.14% | 0.65%      | 20.93% | 31.26% | 22.60% | 19.35%  | 5.21%   |
| May         | 1,026  | 54.78% | 45.22% | 0.97%      | 21.83% | 30.41% | 19.79% | 23.10%  | 3.90%   |
| June        | 968    | 58.47% | 41.53% | 0.21%      | 18.80% | 34.50% | 18.18% | 22.62%  | 5.68%   |
| July        | 1,212  | 59.49% | 40.51% | 0.17%      | 16.25% | 35.15% | 19.39% | 23.18%  | 5.86%   |
| August      | 1,081  | 60.41% | 39.59% | 0.37%      | 16.56% | 34.41% | 20.26% | 22.48%  | 5.92%   |
| September   | 983    | 59.00% | 41.00% | 0.61%      | 14.95% | 35.91% | 19.53% | 23.19%  | 5.80%   |
| October     | 1,116  | 57.97% | 42.03% | 0.45%      | 16.04% | 34.50% | 17.83% | 25.90%  | 5.29%   |
| November    | 1,042  | 58.35% | 41.65% | 0.67%      | 14.68% | 34.36% | 20.35% | 24.57%  | 5.37%   |
| December    | 853    | 55.80% | 44.20% | 0.82%      | 16.65% | 34.11% | 20.63% | 22.98%  | 4.81%   |

**Figure S2:** ALL Patient Clinical Complexity Level (PCCL) from January 2019 to December 2022

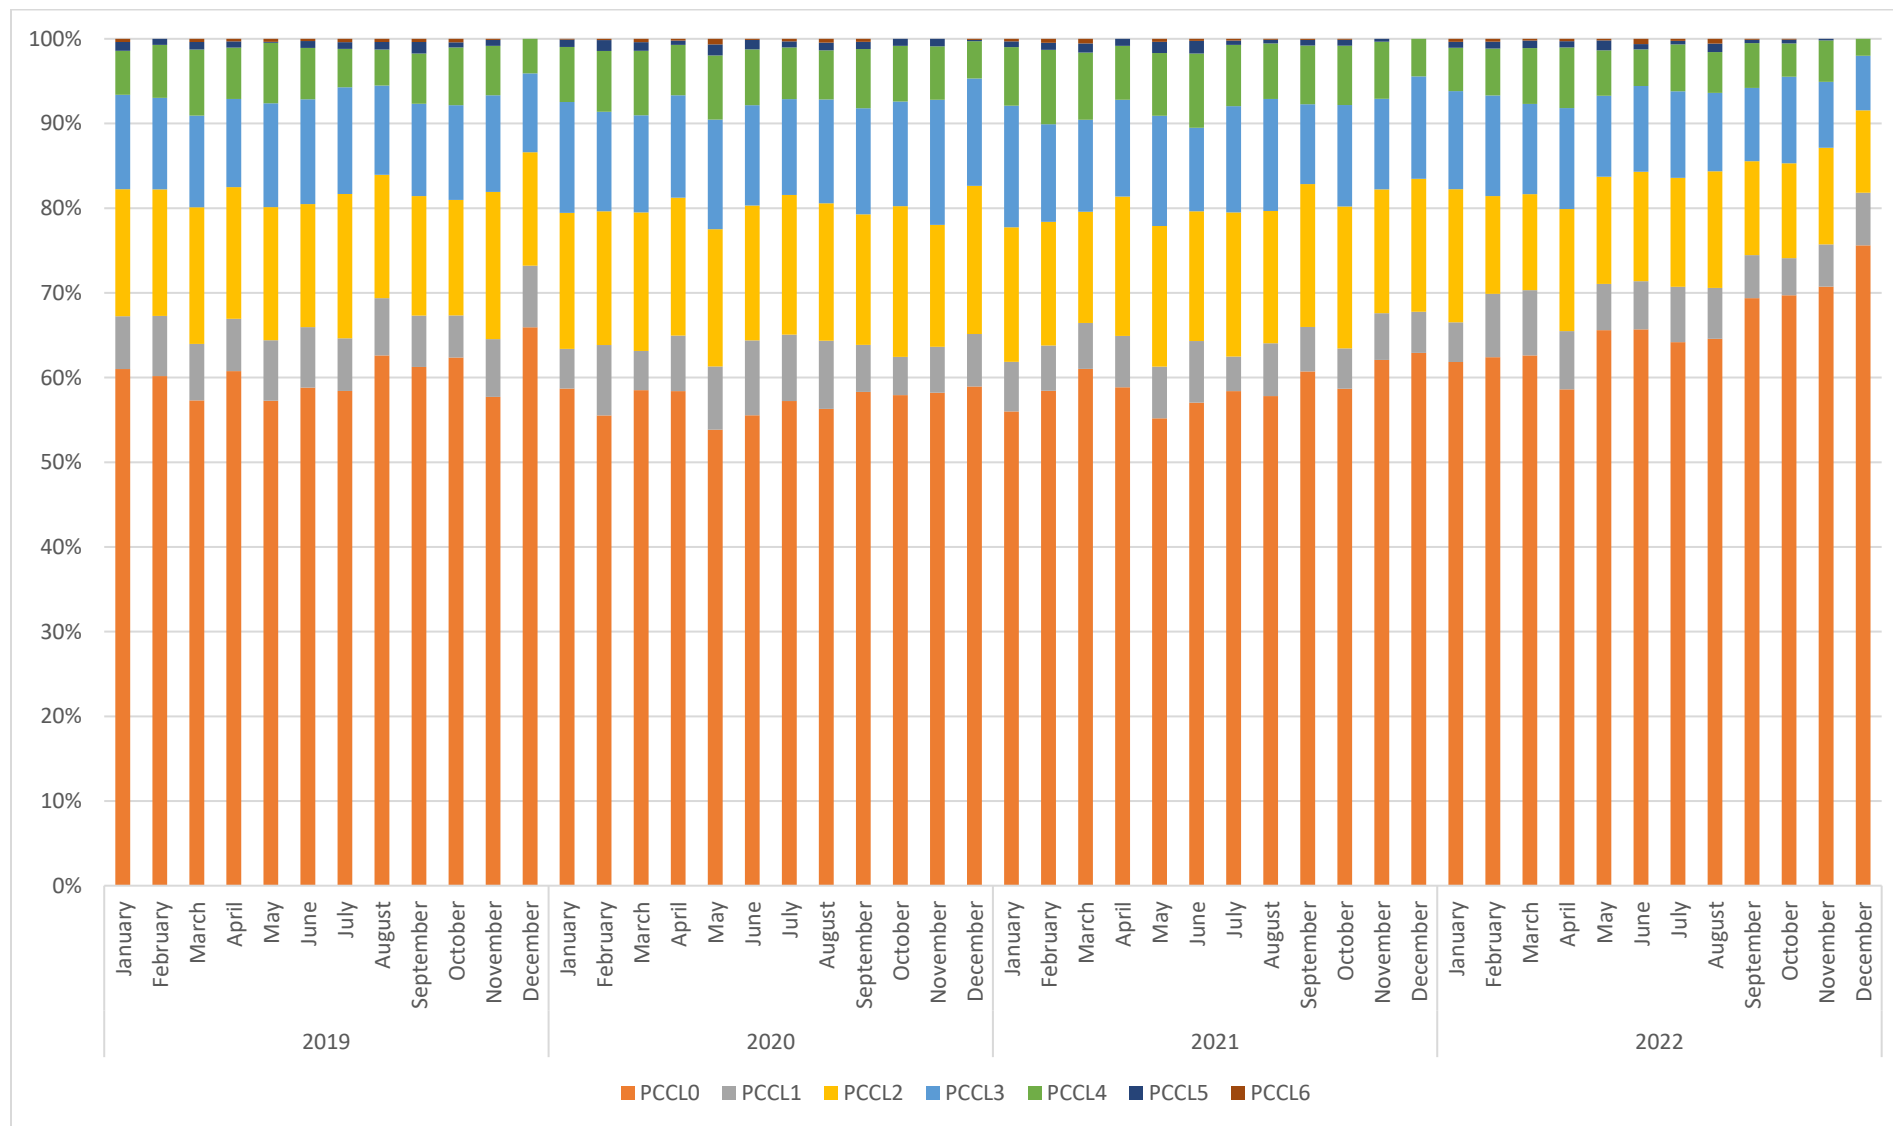

**Figure S3:** Number of ALL (C91.00) admissions by hospital size

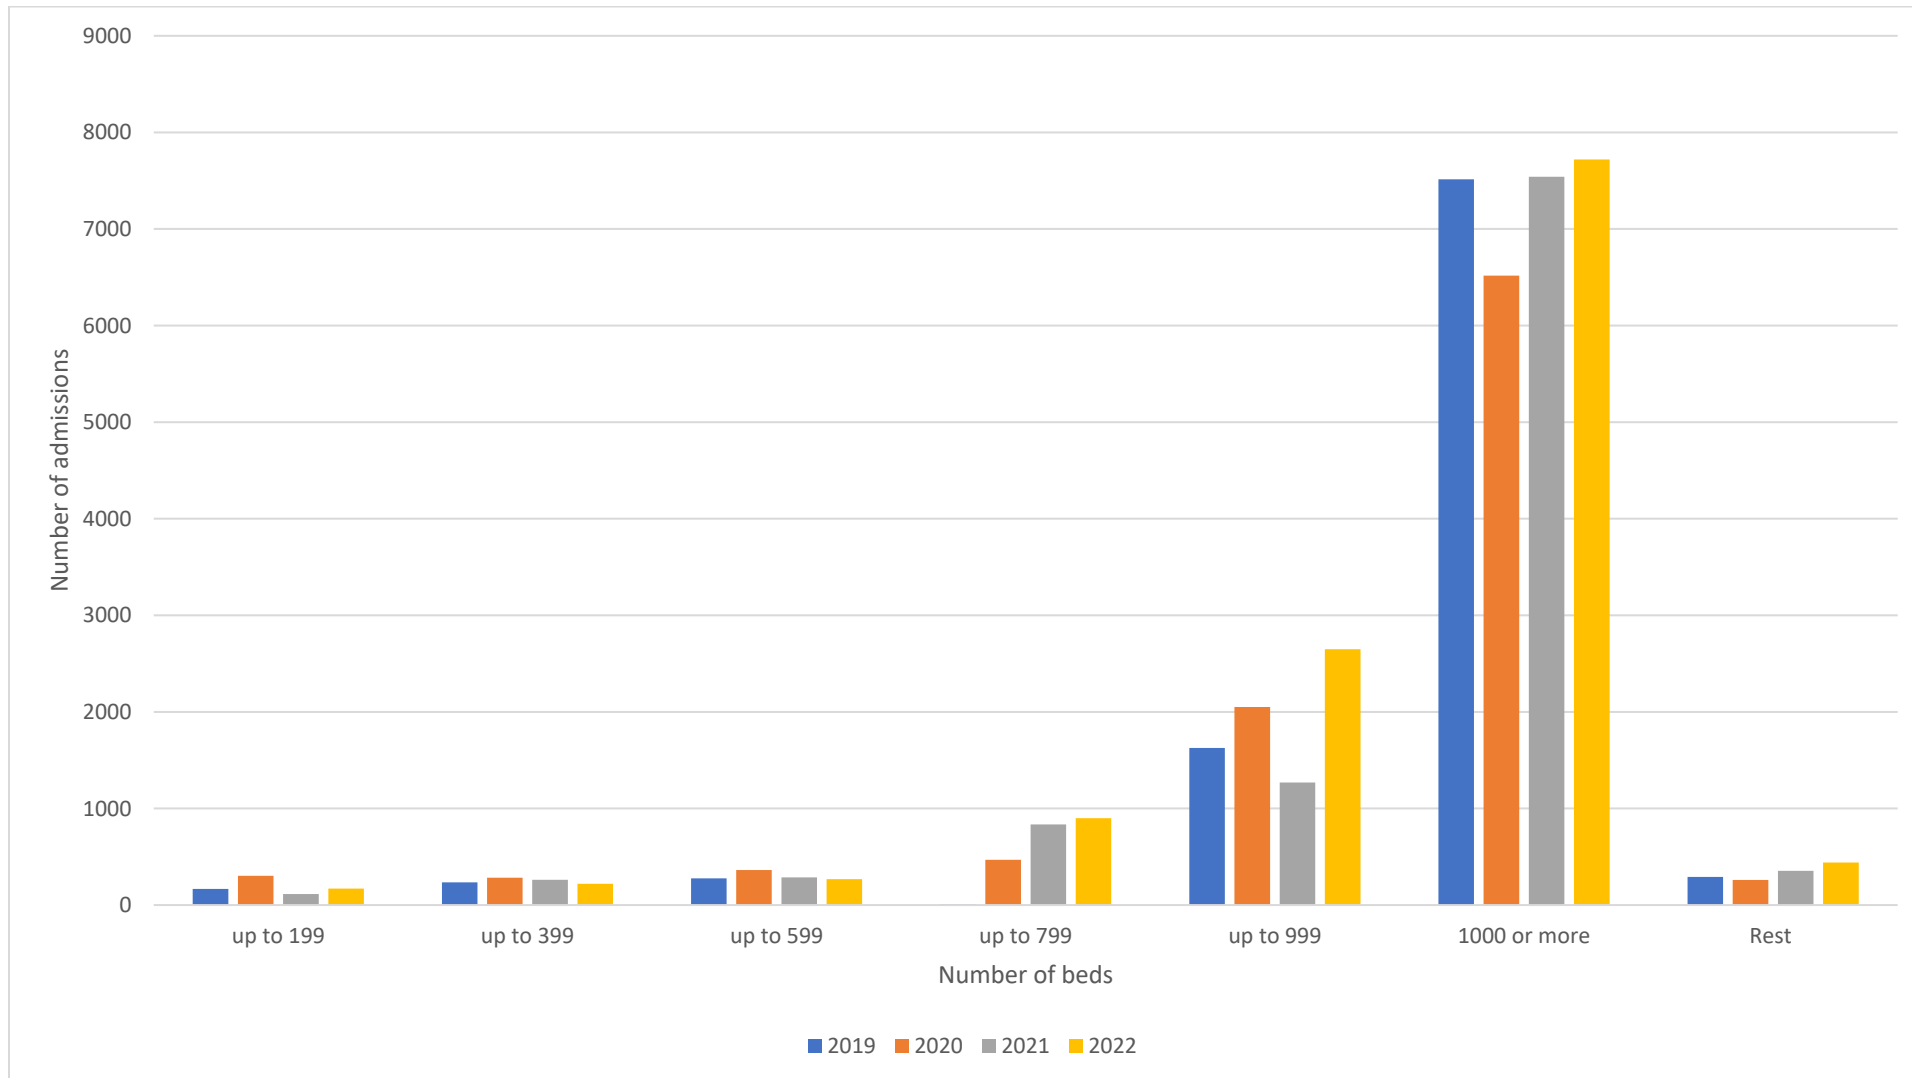



**Figure S4:** Share of ALL (C91.00) admissions by hospital size

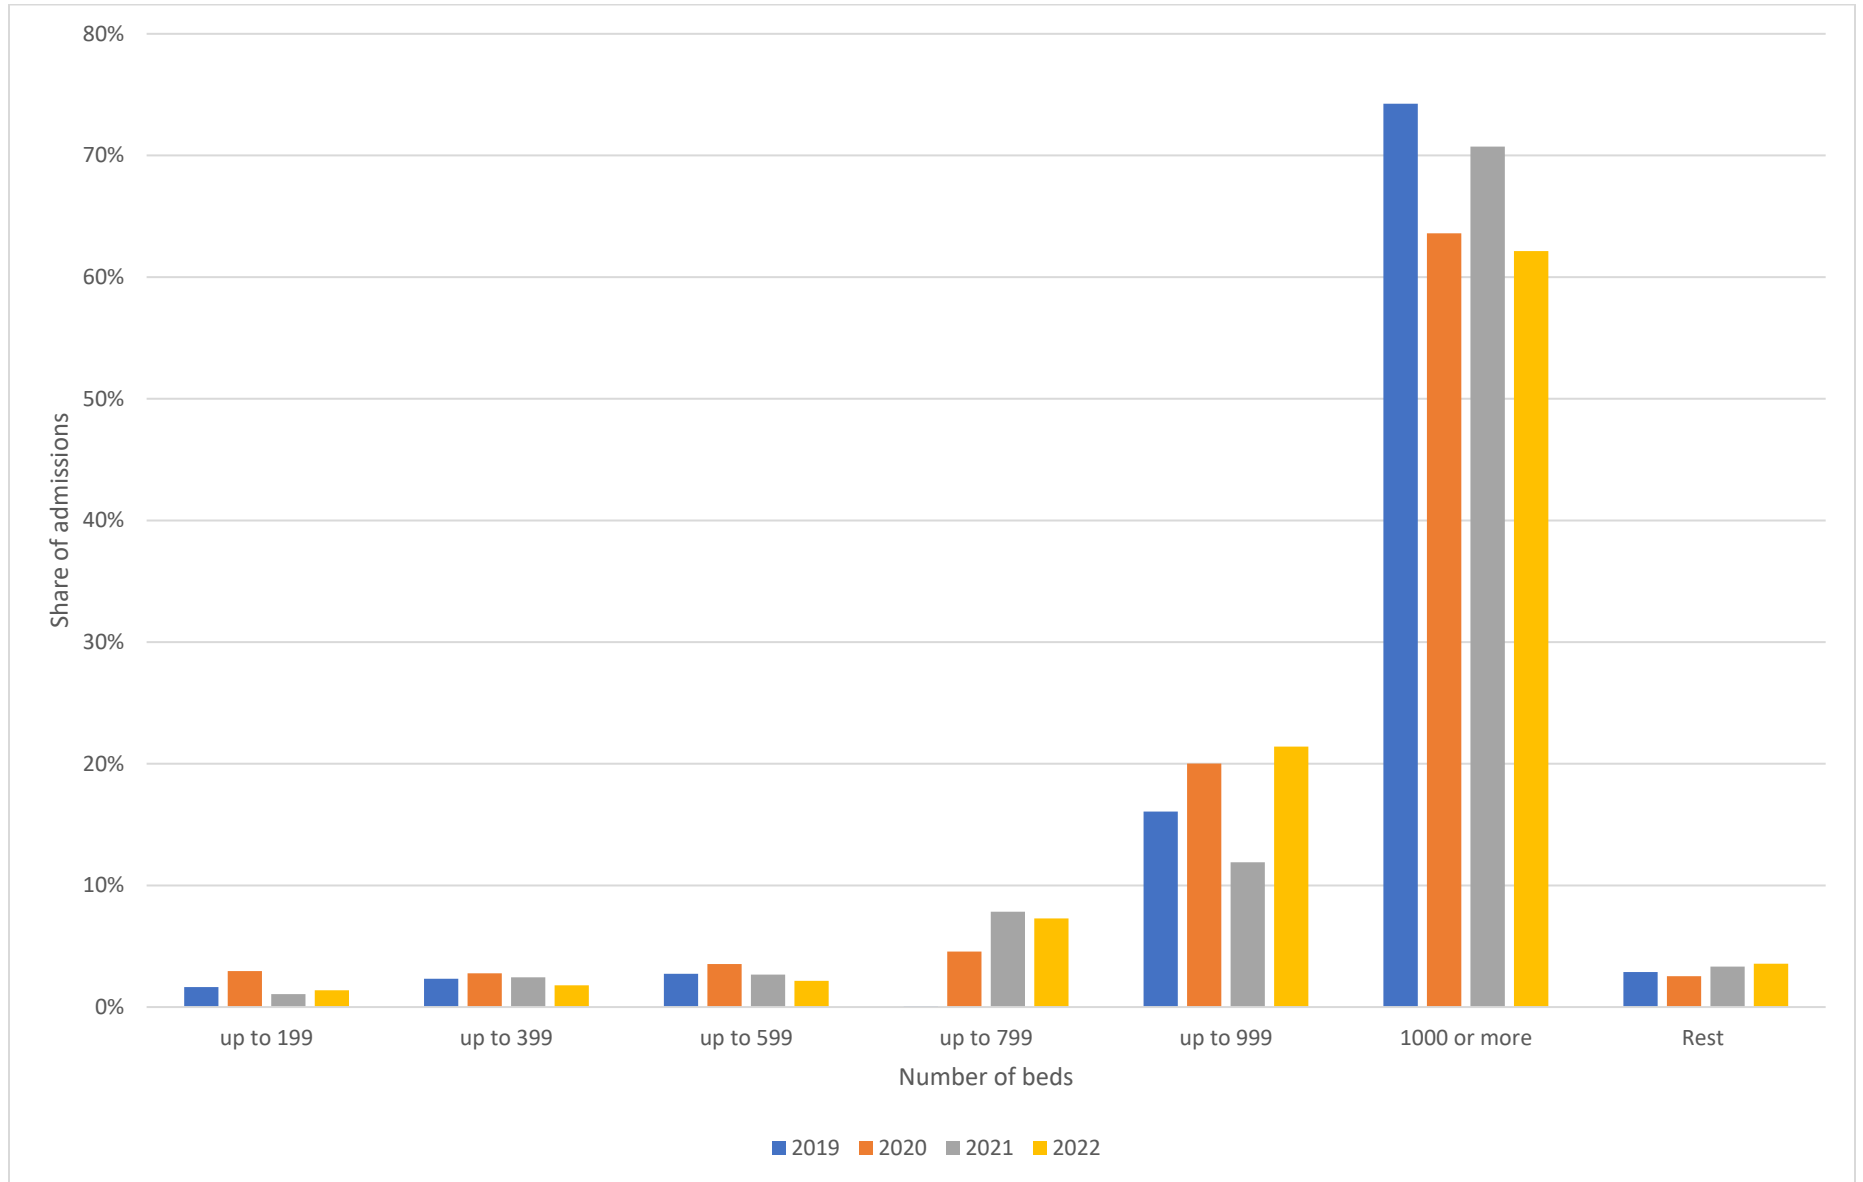

## Section 4: Appendicitis/Appendectomy

Figure S5: Relative (%) change in monthly admissions compared to 2019 by level of complication, 2020-2022

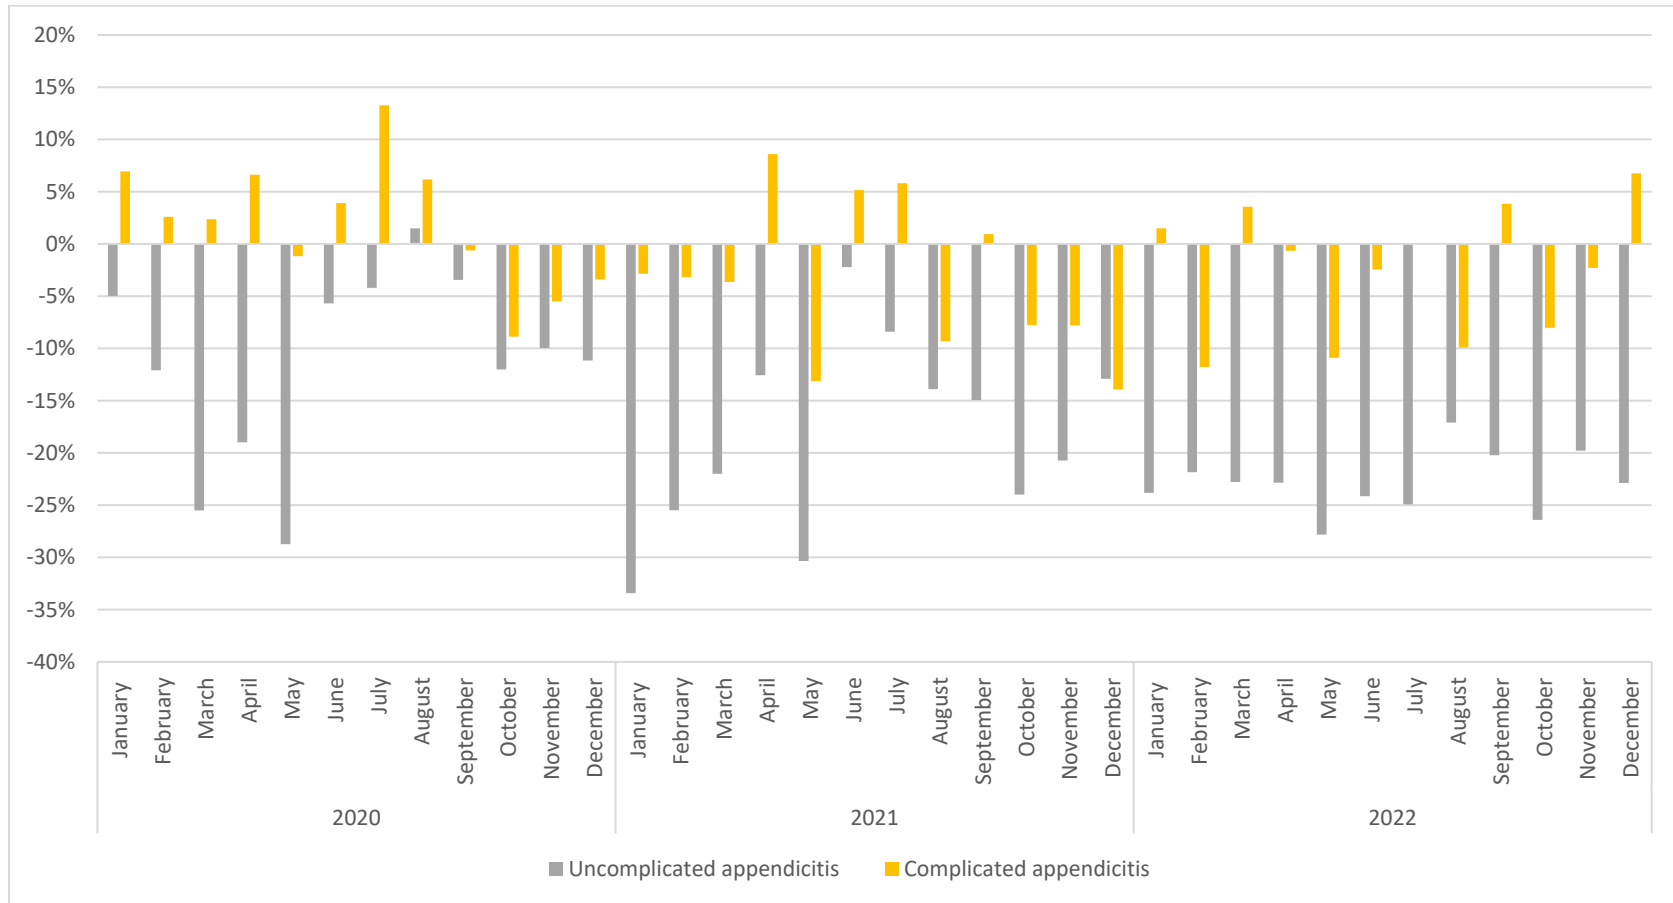

**Figure S6:** Number of Appendicitis admissions by hospital size

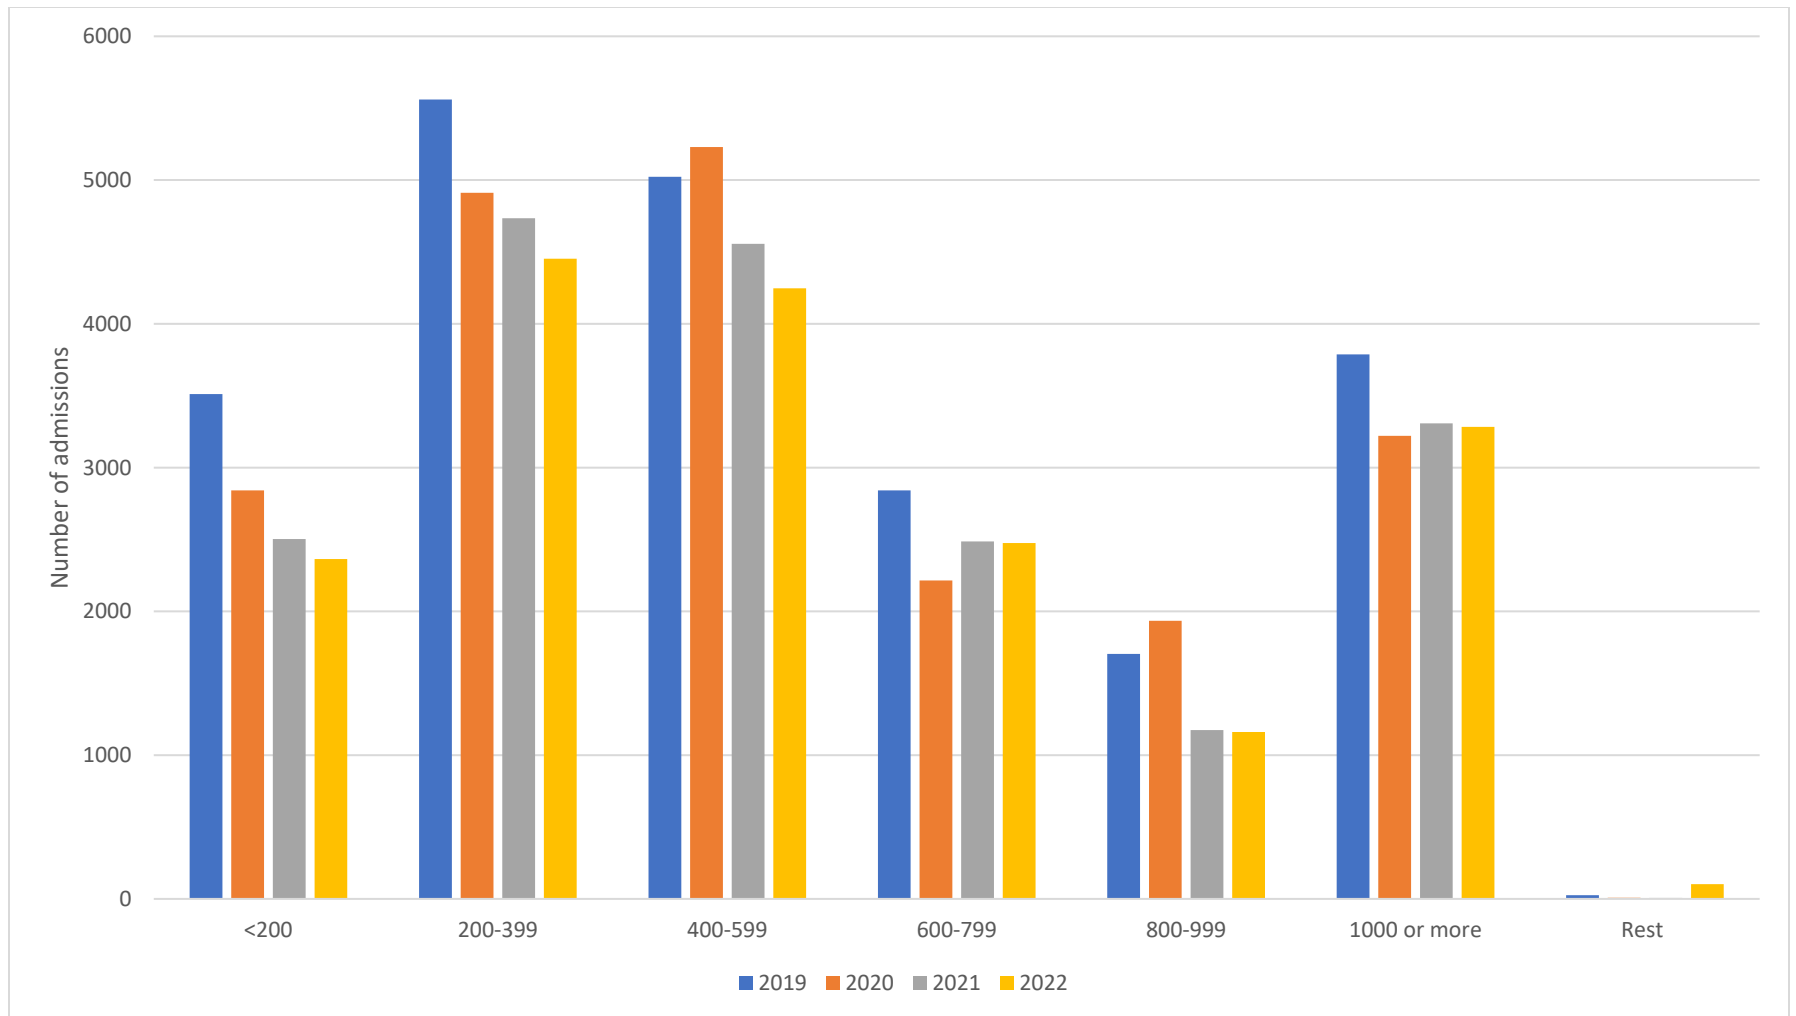

**Figure S7:** Share of appendicitis admissions by hospital size

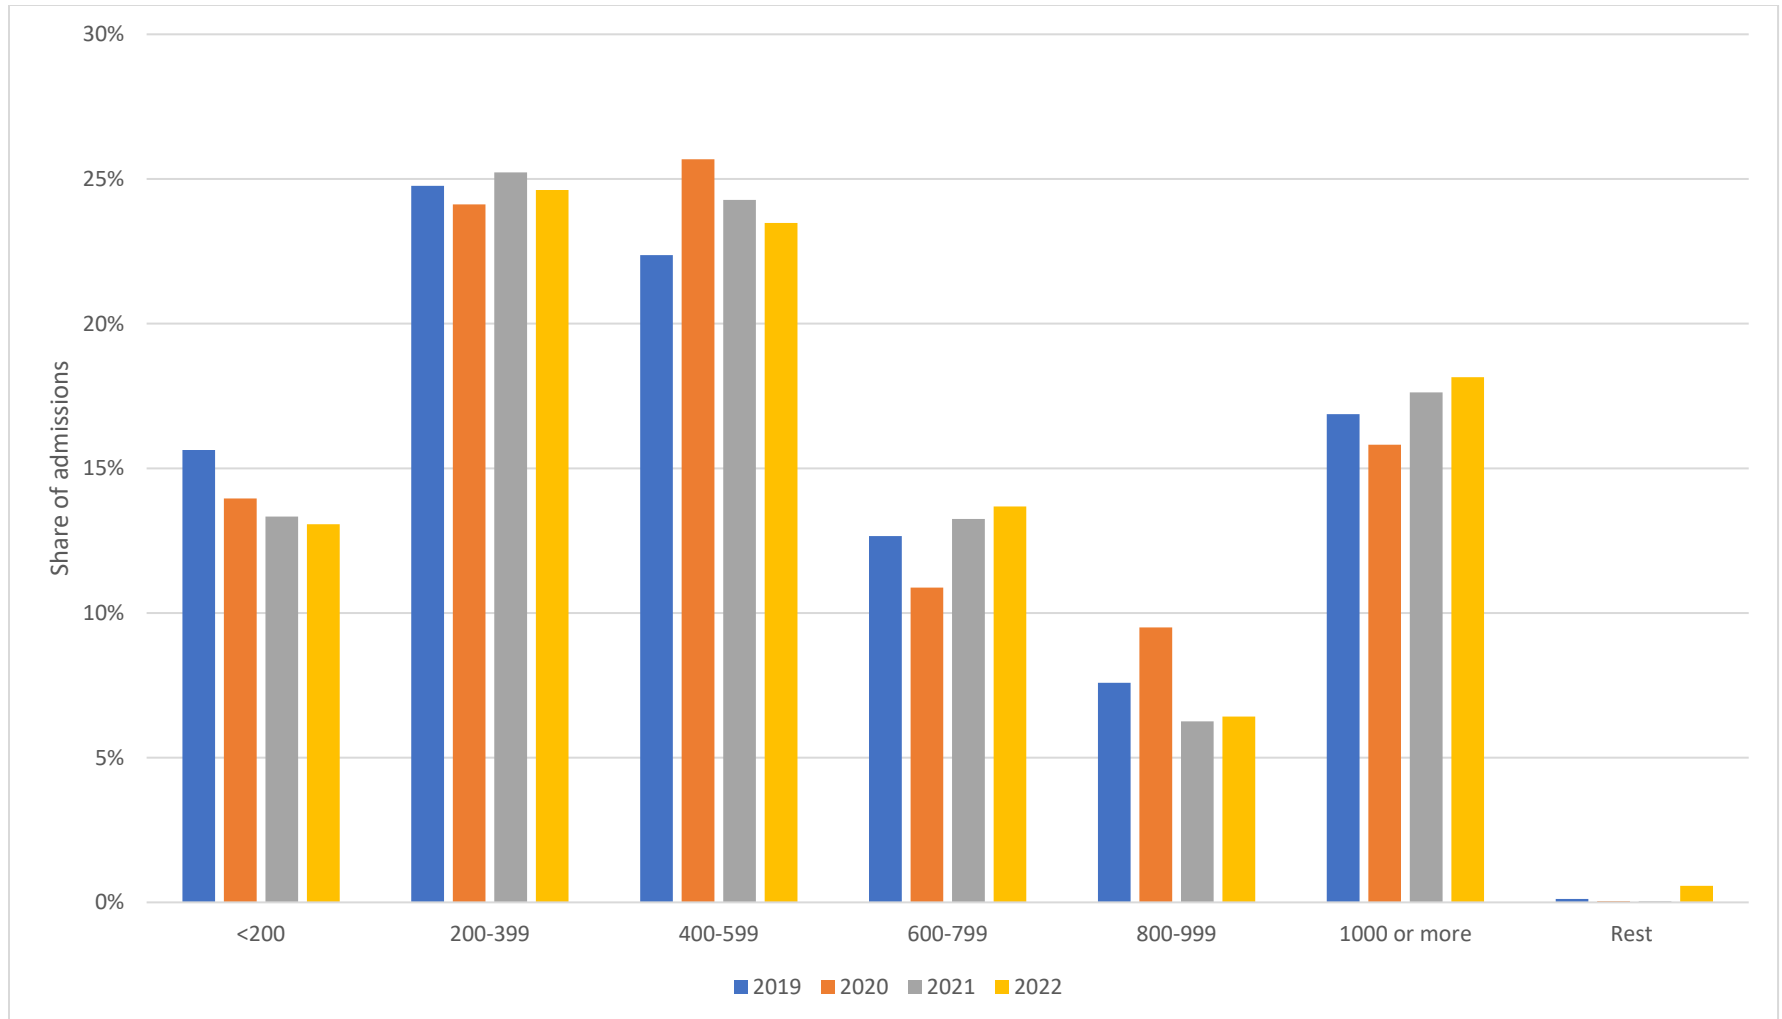

## Section 5: Tonsillectomy/Adenoidectomy

**Figure S8:** Monthly relative (%) change in admissions who underwent tonsillectomy/adenoidectomy compared to 2019, 2020-2022

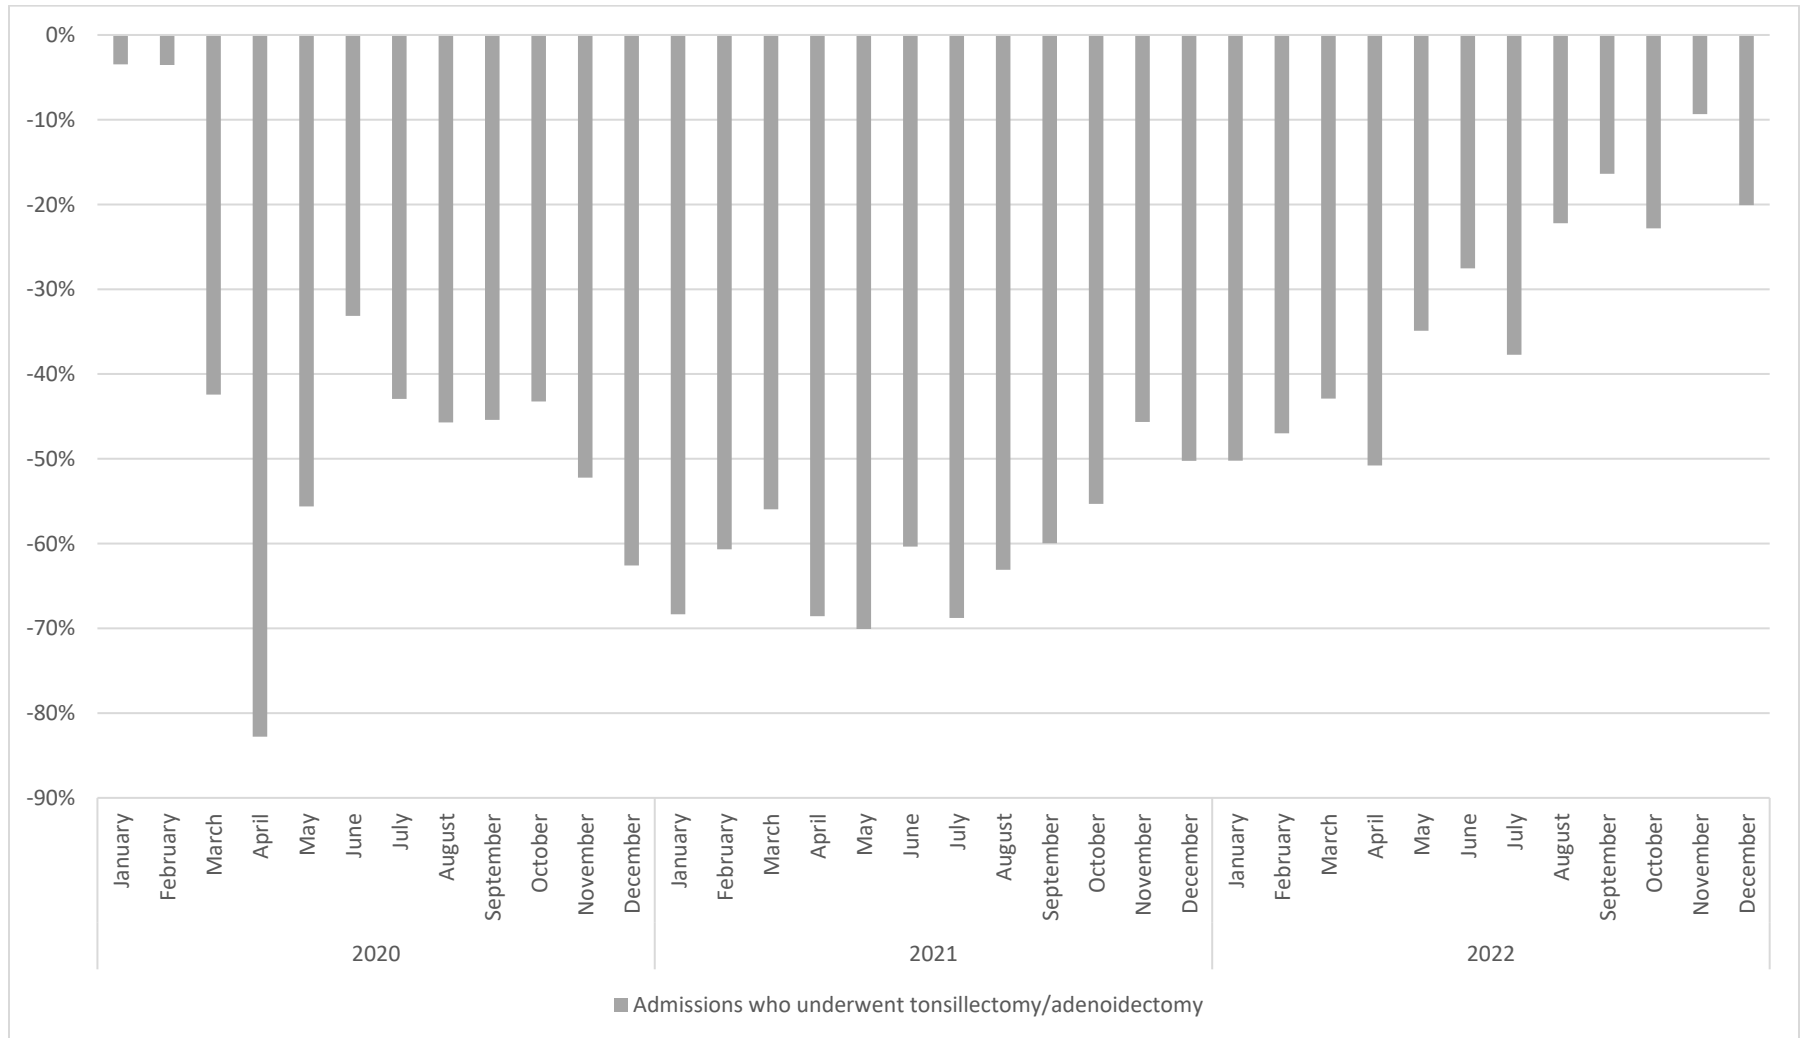

**Figure S9:** Number of tonsillectomy/adenoidectomy procedures by hospital size

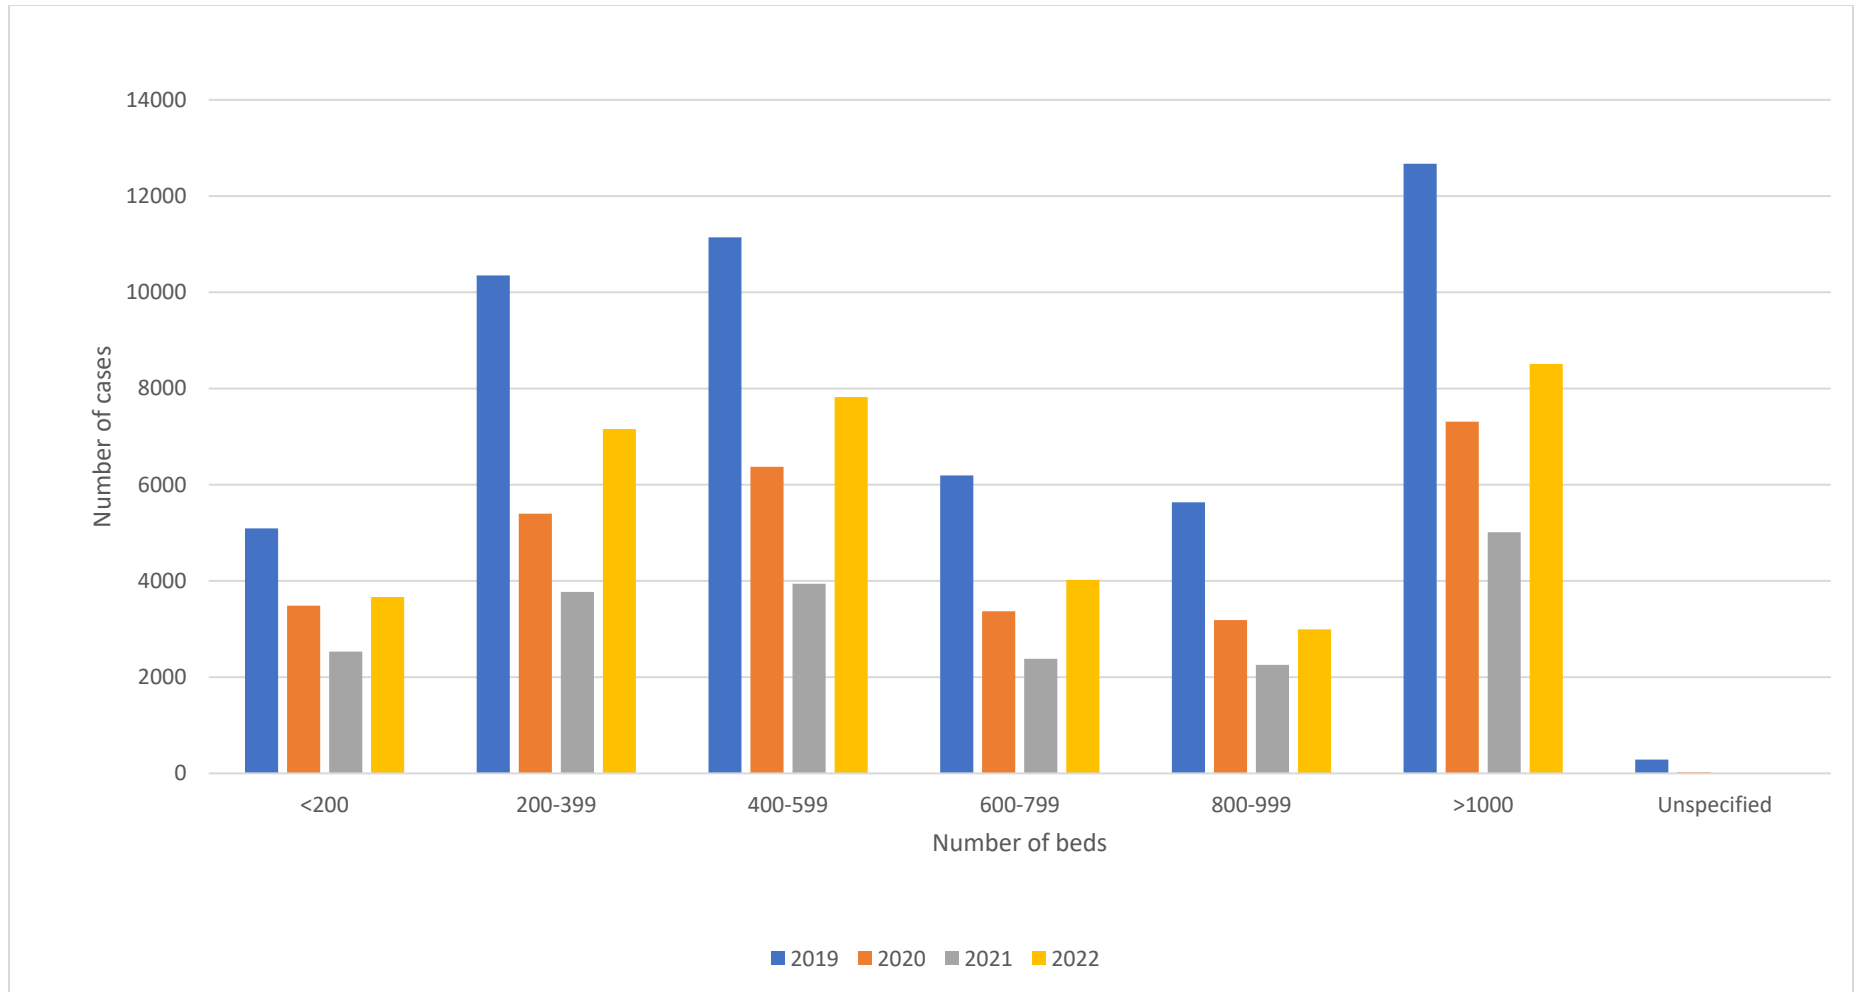

**Figure S10:** Share of tonsillectomy/adenoidectomy procedures by hospital size

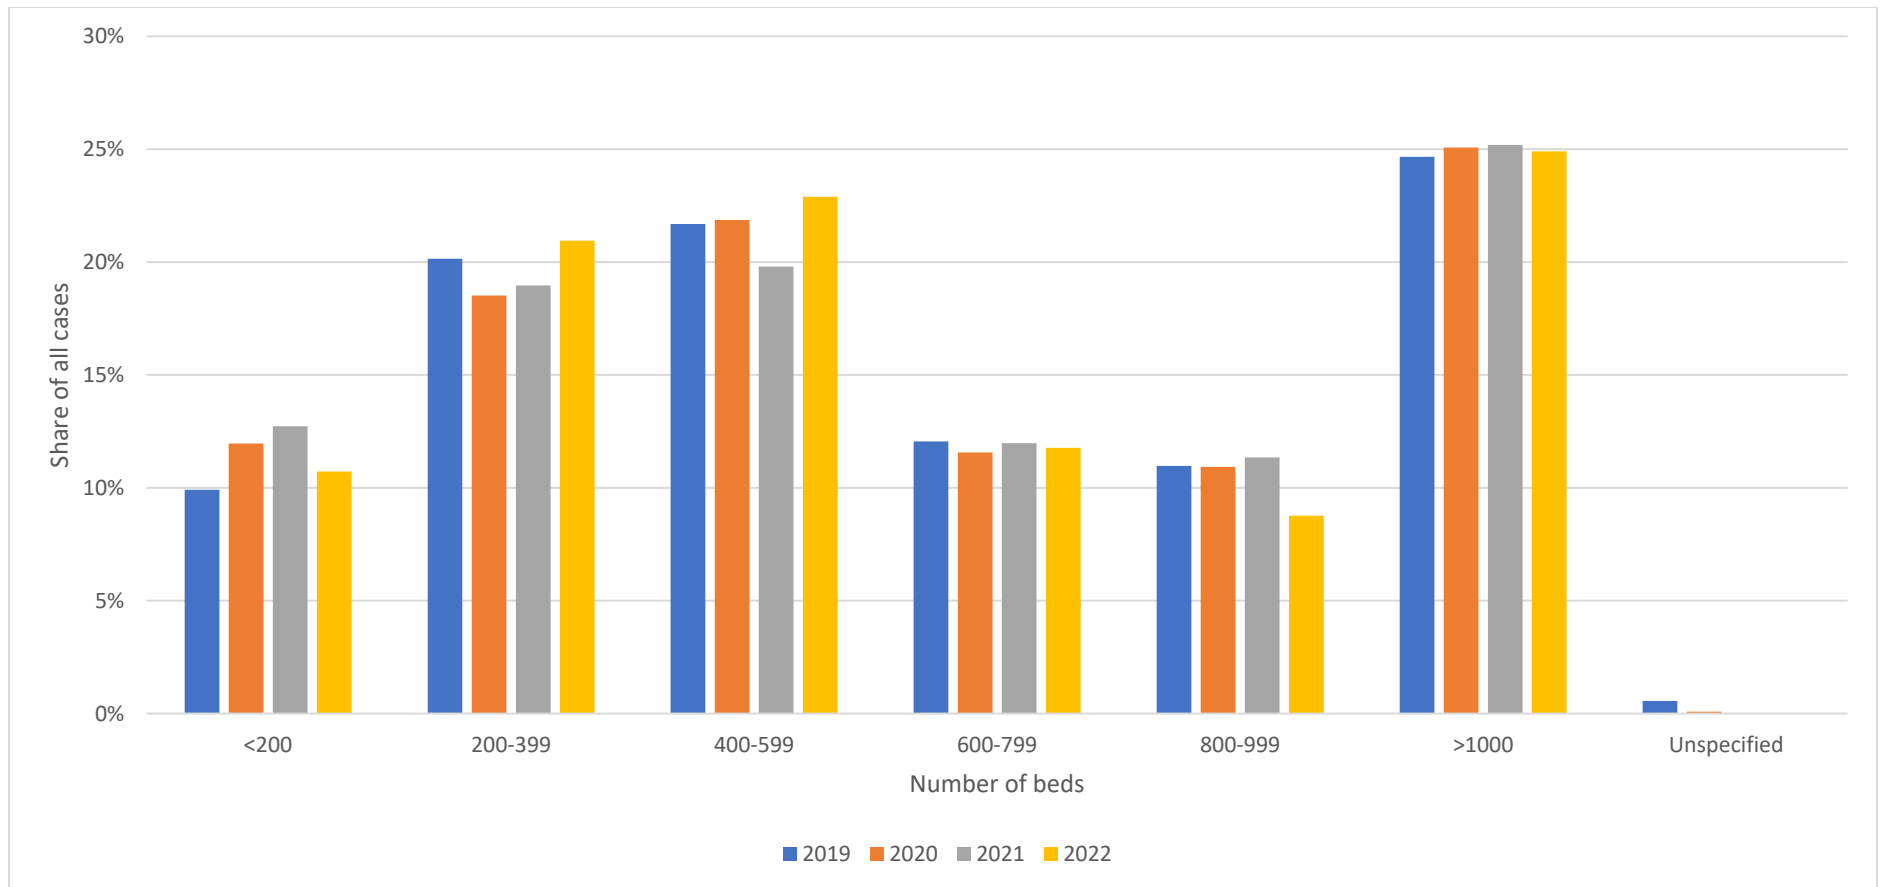

Supplement: MOESM1 [file 25986908]
